# Detecting Long-term Balancing Selection using Allele Frequency Correlation

Katherine M. Siewert<sup>1</sup> and Benjamin F. Voight<sup>2</sup>

<sup>1</sup>Genomics and Computational Biology Graduate Group

<sup>2</sup>Department of Systems Pharmacology and Translational Therapeutics, Department of Genetics, Perelman School of Medicine  
<sup>2</sup>*bvoight@upenn.edu*

## Abstract

Balancing selection occurs when it is beneficial for multiple alleles to be present in a population, which can result in the preservation of variants over long evolutionary time periods. A characteristic signature of this long-term balancing selection is an excess number of intermediate frequency polymorphisms near the balanced variant. However, the expected distribution of allele frequencies at these loci has not been extensively detailed, and therefore existing summary statistic methods do not explicitly take it into account. Using simulations, we show that new mutations which arise in close proximity to a site targeted by balancing selection accumulate at frequencies nearly identical to that of the balanced allele. In order to detect balancing selection, we propose a new summary statistic,  $\beta$ , which detects these clusters of alleles at similar frequencies. Simulation studies show that compared to existing summary statistics, our statistic has improved power to detect balancing selection, and is reasonably powered in non-equilibrium demographic models or when recombination or mutation rate varies. We compute  $\beta$  on 1000 Genomes Project data to identify loci potentially subjected to long-term balancing selection in humans. We report two balanced haplotypes - localized to the genes *WFS1* and *CADM2* - that are strongly linked to association signals for complex traits. Our approach is computationally efficient and applicable to species that lack appropriate outgroup sequences, allowing for well-powered analysis of selection in the wide variety of species for which population data is rapidly being generated.

The availability of large-scale, high-quality genomic data from a wide variety of species has spurred recent efforts to detect genomic regions sub-

jected to natural selection (Vitti *et al.*, 2013, Xu *et al.*, 2015, Singh *et al.*, 2012). One type of pressure, balancing selection, occurs when allelic diversity in a population is advantageous, causing the maintenance of more than one allele at a locus. This selection can arise from overdominance (in which the fitness of heterozygotes at a locus is higher than either type of homozygote) or from frequency-, temporally-, or spatially-dependent selection (Charlesworth, 2006). A classic case of overdominance occurs at the hemoglobin- $\beta$  locus in populations located in malaria-endemic regions. Homozygotes for one allele have sickle-cell anemia, and homozygotes for the other allele have an increased risk of malaria. In contrast, heterozygotes are protected from malaria, and at most have a mild case of sickle-cell anemia (Aidoo *et al.*, 2002, Luzzatto, 2012).

The discovery of novel targets of balancing selection could help us better understand the role this selection has played in evolution, uncover traits that have been preserved for long evolutionary time periods, and aid in interpreting regions previously associated with phenotypes of interest. In addition, theory predicts that signatures of long-term balancing selection will be confined to a relatively narrow region of a few kilobases (Gao *et al.*, 2015). This feature of balancing selection's targets leads to relatively few possible causal variants in comparison to other types of selection, aiding in understanding the underlying phenotype and biology.

Patterns of genetic variation around a locus targeted by balancing selection are distorted relative to a neutral locus. Because both alleles at a balanced locus are maintained in the population, the time to the most recent common ancestor (TMRCA) will be substantially increased if selection is maintained long enough (Charlesworth, 2006). This elevates the levels of polymorphism around the balanced locus and leads to a corresponding reduction in substitutions (*i.e.*, fixed differences relative to an outgroup species) (Charlesworth, 2006).

This deviation in the site frequency spectrum has been harnessed to identify signals of balancing selection in population data, genome-wide. These methods include Tajima's D (Tajima, 1989), which detects an excess number of intermediate frequency alleles. Another commonly used method, the HKA test (Hudson *et al.*, 1987), is sensitive to excess levels of polymorphisms and a deficit of substitutions. While these methods are easily implemented and widely applicable, their power under certain demographic scenarios or equilibrium frequencies is modest (DeGiorgio *et al.*, 2014).

If the selection began prior to the divergence of two species, then both species can share the balanced haplotype or variant (Charlesworth, 2006). These shared variants are unlikely to occur under neutrality (Gao *et al.*,

2015). Several recent studies have utilized primate outgroups to identify these shared polymorphisms (Andrés *et al.*, 2009, Leffler *et al.*, 2013, Teixeira *et al.*, 2015). While specific, this approach only detects ancient selection that persists in both species.

More powerful methods to detect balancing selection have been developed, though challenges have limited their broader application. DeGiorgio *et al.* (2014) proposed two model-based summaries, T1 and T2, which generate a composite likelihood of a site being under balancing selection. However, the most powerful measure (T2) depends on the existence of a closely related outgroup sequence, and on knowledge of the underlying demographic history from which an extensive grid of simulations must first be generated. New advances in estimating population-scale coalescent trees have also been harnessed to detect regions of the genome showing an unusually old TMRCA, but genome-wide application may be computationally prohibitive (Rasmussen *et al.*, 2014).

Despite these methodological advances, the exact frequencies of the excess intermediate frequency alleles seen under balancing selection has not been precisely quantified. The key insight motivating our work was the observation that the frequencies of these excess variants closely match the balanced allele's frequency. We confirm this signature using simulations.

Motivated by this observation, and inspired by the structure of summary-spectrum based statistics (Tajima, 1989, Fay and Wu, 2000), we developed a new summary statistic that detects these clusters of variants at highly correlated allele frequencies. This statistic is computationally efficient and does not require knowledge of the ancestral state or an outgroup sequence. Using simulations, we show that our approach has equivalent or higher power to detect balancing selection than similar approaches, and retains power over a range of population genetic models and assumptions (i.e., demography, mutation, or recombination).

We report a genome-wide scan applying our statistic to humans using 1000 Genomes Project data (The 1000 Genomes Consortium, 2015), focusing on regions of high sequence quality. We find signals of balancing selection at two loci (*WFS1* and *CAMD2*) with functional evidence supporting these as the target genes, as well as signals at several previously known loci.

# 1 New Approaches

## 1.1 Allelic class build-up

We begin with an idealized model generating the expected distribution of allele frequencies around a balanced variant. Consider a new neutral mutation that arises within an outcrossing, diploid population. In a genomic region not experiencing selection, this mutation is expected to eventually either drift out of the population, or become fixed (*i.e.*, become a substitution). However, if a neutral allele arises at a locus experiencing balancing selection, then its frequency can reach no higher than the frequency of the balanced allele it arose in linkage with, assuming no recombination (**Fig. 1**). This is because the frequency of the balanced allele is constrained due to the balancing selection. Without a recombination event and given enough time, variants that are fixed within these allelic classes (defined by the selected variant) begin to accumulate (Charlesworth, 2006, Hey, 1991).

Eventually, recombination decouples variants from the balanced allele, which then allows them to drift to loss or fixation within the population. Even after recombination, the frequency of the variants previously fixed in their allelic class will remain close to that of their previous class until enough time has passed for genetic drift to significantly change their frequencies. Therefore, this model predicts the classic signature of an increase in diversity within a genomic region closely linked to a site under balancing selection. Furthermore, it predicts the more precise signature that the variant frequencies should be similar to that of the balanced site.

We used Wright-Fisher forward simulations to model neutral variants in a region closely linked to a variant under balancing selection (**Methods**). We observed the excess of polymorphism and reduction in substitutions classically expected in close linkage to a site under balancing selection (**Fig. S1**). Within the region that is not expected to have experienced recombination since the start of the selection, we observed an excess number of variants with frequencies identical to that of the variant under balancing selection. This excess was much less significant for simulations in which there was no variant subject to balancing selection (**Fig. 2a**). For larger windows, there is excess correlation, but it is less significant due to recombination decoupling variants from the selected site (**Fig. 2b**). These data suggest that the presence of many variants with correlated alleles frequencies is a precise signature of balancing selection.

## 1.2 A Measure for Allele Frequency Correlation

To capture this signature, we derive a measurement of frequency similarity between a core variant and a second variant of interest. Let  $n$  be the number of chromosomes sampled,  $f_0$  be frequency of the core SNP,  $f_i$  be the frequency of the second SNP,  $i$ , and  $p$  be a scaling constant (see **Supplementary note**). Finally,  $g(f)$  returns the folded allele frequency and  $m$  is the maximum possible folded allele frequency difference between the core SNP and SNP  $i$ . We then measure the similarity in frequency,  $d_i$ , by:

$$g(f) = \min(f, n - f) \quad (1)$$

$$m = \max\left(g(f_0), \frac{n}{2} - g(f_0)\right) \quad (2)$$

$$d_i = \left(\frac{m - |g(f_0) - g(f_i)|}{m}\right)^p \quad (3)$$

Thus,  $g(f_0) - g(f_i)$  is the folded frequency difference between the core SNP and the SNP under consideration. We then subtract this value from  $m$ , the maximum folded frequency difference possible with the core SNP, and then divide by  $m$ . This gives the fraction of the maximum folded frequency difference of the SNP under consideration compared with the core SNP. We then raise it to the power  $p$  so that we can weight variants in a non-linear fashion with respect to this fraction. Therefore,  $d_i$  can range from 0 if a SNP has the maximum frequency difference with the core SNP, to 1 if SNP  $i$  is at the same frequency as the core SNP. We give guidance on the choice of  $p$  in the Online Supplement. However, the power of  $\beta$  is fairly insensitive to its value (**Fig. S12**). We use the folded site frequency spectrum in calculating  $d_i$ , as the frequency difference between the core variant and the second variant is independent of whether the derived or ancestral allele of the nearby allele is in linkage with the derived or ancestral core allele.

In a region under long-term balancing selection, the average  $d_i$  between a core SNP and the surrounding variants is expected to be elevated. However,  $d_i$  alone is not sufficient to detect balancing selection, as its value will be sensitive to changes in the mutation rate in the surrounding region, and it does not take into account the probability of seeing each allele frequency under neutrality.

## 1.3 Capturing Allelic Class Build-up

We propose a statistic,  $\beta$ , that uses our measure of allele frequency correlation,  $d_i$ , combined with a measure of the overall mutation rate, to detect

balancing selection. Our approach is inspired by previous summary statistics of the site frequency spectrum (Tajima, 1989, Fay and Wu, 2000). These methods compute the difference between two estimators of  $\theta$ , the population mutation rate parameter, one of which is more sensitive to characteristics of the site frequency spectrum distorted in the presence of natural selection. We propose to calculate  $\beta$  at each SNP in a region of interest to identify loci in which there is an excess of variants near the core SNP's allele frequency, as evidence of balancing selection.

It has been previously shown that the mutation rate in a region can be estimated as:  $\hat{\theta}_i = S_i * i$ , where  $S_i$  is the total number of derived variants found  $i$  times in the window from a sample of  $n$  chromosomes in the population (Fu, 1995). An estimator of  $\theta$  can then be obtained by taking a weighted average of  $\theta_i$ . In our method, we weight by the similarity in allele frequency to the core SNP, as measured by  $d_i$ . If there is an excess of variants at frequencies close to the core SNP allele frequency, then our new estimator,  $\theta_\beta$ , will be elevated. We propose:

$$\beta = \hat{\theta}_\beta - \hat{\theta}_w \quad (4)$$

$$\hat{\theta}_\beta = \frac{\sum_{i=1}^{n-1} i d_i S_i}{\sum_{i=1}^{n-1} d_i} \quad (5)$$

$$\hat{\theta}_w = \frac{\sum_{i=1}^{n-1} S_i}{\sum_{i=1}^{n-1} \frac{1}{i}} \quad (6)$$

$\theta_w$  is simply Watterson's estimator (Watterson, 1975).  $\beta$  is, in effect, a weighted average of SNP counts based on their frequency similarity to the core SNP. We exclude the core site from our estimation of  $\theta_w$  and  $\theta_\beta$ .

To better understand the properties of  $\beta$ , we used simulations to examine its distribution with and without a balanced SNP (**Fig. S2**). As expected, under long-term balancing selection  $\beta$  tends to be greater than zero, and under neutrality it tends to be close to zero.

We note that the mean value of  $\beta$  in neutral simulations increases slightly with higher equilibrium frequencies. This behavior is expected because higher frequency alleles will tend to have a longer TMRCA and therefore higher diversity. The mean value of  $\beta$  was lowest for both balanced and neutral SNPs of frequency 0.5, which we posit is due to the fact that this allele

frequency requires the most time for mutations to drift up to the equilibrium frequency needed to fix in their allelic class.

In this version of  $\beta$ , knowledge of the ancestral state for each variant is required. To address this possible shortcoming, we developed a version of the statistic based on a folded site frequency spectrum. This formulation is available in the **Online Supplement**.

While our statistic can be calculated on any window size, previous work has suggested that the effects of balancing selection localize to a relatively narrow region surrounding the balanced site (Gao *et al.*, 2015). Ultimately, the optimal window size depends on the recombination rate, as it breaks up allelic classes. In the **Online Supplement**, we present some mathematical formulations to suggest reasonable window sizes.

## 2 Results

### 2.1 Power Analysis

We used forward simulations (Haller and Messer, 2017) to calculate the power of our approach to detect balancing selection relative to other commonly utilized statistics. Initially, we simulated a single, overdominant mutation for each simulation replicate in an equilibrium demographic model, varied over a range of balancing selection equilibrium frequencies and onset times (**Methods**). We also simulated genomic regions in which all variants were selectively neutral. We then computed the power of  $\beta$ , Tajima's D, HKA, and T1 to distinguish between simulation replicates with a balanced variant (our balanced simulations) or those with only neutral mutations (our neutral simulations). As a reference, we also measured the likelihood-based statistic, T2.

$\beta$ , Tajima's D and HKA use a sliding window approach, in units of base pairs, when scanning the genome, while T1 and T2 use the number of informative sites (polymorphisms plus substitutions). In order to make a fair comparison between these methods, we first determined the most powerful window size for each method using simulations (**Fig. S5**). For the summary statistics, a 1kb window size did well across a range of selection timings and equilibrium frequencies. This 1kb region matches the approximate size of the ancestral region, in which there have been no expected recombination events between allelic classes (**Supplementary Info**).

For T1 and T2, a number of informative sites of approximately 20, or 10 on either side of the core site, achieved maximum power in simulations (**Fig. S6**). Furthermore, this roughly matches the expected number of



informative sites in a 1kb region under selection (**Supplementary Information**). Therefore, a window of 20 total informative sites is roughly equal to the expected ancestral region size, which is roughly equal to the window at which all these methods achieve optimal power. For this reason, we used a 1kb window or 20 informative sites, as applicable, when calculating each statistic.

Compared to other summaries,  $\beta$  had the greatest performance across most parameter combinations (**Fig. 3, Fig. S4-17**). As expected,  $\beta$  performs slightly worse than T2 under many conditions. However, unlike T2, our method does not require an outgroup sequence, or grids of simulations which are computationally expensive.

We next investigated the power of  $\beta$  under more complex demographic scenarios (**Methods**) compatible with recent human history (DeGiorgio *et al.*, 2014). We found that  $\beta$  performs well under bottleneck and expansion models. Under an expansion scenario, the performance of all methods decreased (**Fig. S7**), consistent with results from previous studies (DeGiorgio *et al.*, 2014), possibly due to the larger population size increasing the expected time until an allele can fix in allelic class. The effect of a population bottleneck on power was less drastic and led to a slight increase in power to detect more recent selection (**Fig. S8**).

Population substructure can confound scans for selection (Ingvarsson, 2004, Schierup *et al.*, 2000). To investigate the power of our method in these scenarios, we simulated two models of population substructure: one with complete subdivision, and one with a two-pulse model of Neanderthal admixture. Power with Neanderthal admixture stayed roughly the same as without (**Fig. S9**). This is as expected, as most haplotypes introduced through admixture are expected to be at very low frequency.

We then investigated power in the case of complete population subdivision into two equal sized subpopulations. To mimic the effects of unknown population structure, we then pooled 50 individuals from each subpopulation with which to perform the statistical calculations. In this case, the power of all methods to detect balancing selection at equilibrium frequency 0.5 decreased considerably (**Fig. S10**). This matches expectation, as this situation is expected to drastically increase the number of variants at frequency 0.5.

We next examined the power for all methods under models of variable mutation rates, recombination rates, and sample sizes. As expected, the power of all methods was positively correlated with mutation rate (**Fig. S13 and S15**), and negatively correlated with recombination rate (**Fig. S14 and S16**). A higher mutation rate provides more variants that can



accumulate within an allelic class, whereas a lower recombination rate allows for longer haplotypes upon which mutations can accumulate.  $\beta$  has reasonable power down to very small sample sizes, achieving near maximum power with as few as 20 sampled chromosomes (**Fig. S19 and S20**). In practice, the sample size used to calculate the frequency of each variant may differ between variants. We tested the power of  $\beta$  when the sample size of each variant is downsampled by a random amount from 0 to 25 individuals. We found that this decreases power very slightly, and that lower values of  $p$  perform better in this scenario (**Fig. S11**).

Finally, power remained high under frequency-dependent selection (**Fig S18**), and when a lower selection coefficient was simulated (**Fig. S17**). This matches expectation, as frequency-dependent selection is expected to maintain haplotypes in the population for long time periods, causing allelic class build-up. A lower selective coefficient would be expected to lower the probability of maintenance of the balanced allele in the population, but conditioned on this maintenance, should not affect power, as we observed.

Simulations show that the power of the folded version of  $\beta$  is similar to the unfolded version at intermediate allele frequencies, but suffers at very high frequencies (**Fig. S4**). However, even at these frequencies, it still outperforms Tajima's D, the only other statistic of those tested which does not require knowledge of ancestral state or an outgroup.

## Genome-wide Scan in Human Populations

We applied the unfolded version of  $\beta$  to population data obtained by the 1000 Genomes Project (Phase 3) to detect signatures of balancing selection (The 1000 Genomes Consortium, 2015). We calculated the value of  $\beta$  in 1kb windows around each SNP in all 26 populations, separately. We focused on regions that passed sequencing accessibility and repeat filters (**Methods**).

In addition, we filtered out variants which did not have a minimum frequency of 15% in at least one population. The purpose of the frequency filter is to prevent false positives: we were unable to simulate balancing selection with a folded equilibrium frequency of less than 15%, due to the high frequency of one allele drifting out of the population. Although this phenomenon has not been described for population sizes near that of humans to our knowledge, it has been detailed for lower effective population sizes (Ewens and Thomson, 1970). Therefore, it is unlikely that a balanced variant with a folded equilibrium frequency less than 15% could successfully be maintained in a population. For this reason, we excluded variants that are of folded frequency less than 15% in every population from our analysis,

as any signal at these sites is likely a false positive.

We defined extreme  $\beta$  scores as those in the top 1% in the population under consideration (**Methods**). We analyzed the autosomes and X-chromosome separately. Because our method is substantially better powered to detect older selection, we focus on signals of selection that predate the split of modern populations. For this reason, we further filtered for loci that were top-scoring in at least half of the populations tested (**Methods**). We focus on results of our unfolded  $\beta$  scan, however, we also scanned using the folded  $\beta$  statistic to test for robustness of our top scoring sites.

We identified 8,702 autosomal, and 317 X-chromosomal, top-scoring variants that were shared among at least half ( $\geq 13$ ) of the 1000 Genomes populations (**Supplementary Data**). Together, these variants comprise 2,453 distinct autosomal and 86 X-chromosomal loci, and these signatures overlapped 692 autosomal and 29 X-chromosomal genes.

## 2.2 Characterization of Identified Signals

Trans-species haplotypes are two or more variants that are found in tight linkage and are shared between humans and a primate outgroup (in our case, chimpanzee). These haplotypes are highly unlikely to occur by chance, unlike trans-species SNPs, which are expected to be observed in the genome due to recurrent mutations (Gao *et al.*, 2014). These haplotypes present a signature of balancing selection independent from the signature captured by  $\beta$ . If  $\beta$  captures true signatures of balancing selection, one would expect an enrichment of high  $\beta$  values at trans-species haplotypes. We found that  $\beta$  was in fact predictive of trans-species haplotype status from Leffler *et al.* (2013), even after including adjustments for the distance to the nearest gene ( $P < 2 \times 10^{-16}$ , **Methods**).

Our scan identified several loci that have been previously implicated as putative targets of balancing selection (**Supplementary Data**). Several major signals occurred on chromosome 6 near the HLA, a region long presumed to be subjected to balancing selection (Hedrick, 1998, Hughes and Nei, 1988). In particular, we found a strong signal in the HLA at a locus influencing response to Hepatitis B infection, rs3077 (Jiang *et al.*, 2015, DeGiorgio *et al.*, 2014, Thursz *et al.*, 1997). Several additional top sites in our scan matched those from DeGiorgio *et al.* (2014). These include previously found sites that tag phenotypic associations (Welter *et al.*, 2014), including *MYRIP*, involved with sleep-related phenotypes (Gottlieb *et al.*, 2007), and *BICC1*, associated with corneal astigmatism (Lopes *et al.*, 2013). We focus

on two of our top-scoring regions, located in the *CADM2* and *WFS1* genes. In addition to passing the 1000 Genomes strict filter and the RepeatMasker test, these haplotypes also passed Hardy-Weinberg filtering (**Methods**).

### 2.3 A signature of selection at the *CADM2* locus

One of our top-scoring regions fell within an intron of the cell adhesion molecule 2 gene, *CADM2*. This locus contains a haplotype with  $\beta$  scores falling in the top 0.25 percentile in 17 of the 1000 Genomes populations, and scoring in the top 0.75 percentile across all 26 populations (**Fig. 4**). This site was also a top scoring SNP in the CEU population based on the T2 statistic (DeGiorgio *et al.*, 2014). In our scan using the folded  $\beta$  statistic, this haplotype contained top-scoring variants in 20 populations, indicating the result was not due to ancestral allele miscalling. In the remaining six populations, the haplotype was at folded frequency 0.15 or lower, where the folded version of  $\beta$  has significantly reduced power.

To elucidate the potential mechanisms contributing to the signal in this region, we overlapped multiple genomic datasets to identify potential functional variants that were tightly linked with our haplotype signature. First, one variant that perfectly tags (EUR  $r^2 = 1.0$ ) our signature, rs17518584, has been genome-wide significantly associated with cognitive functions, including information processing speed (Davies *et al.*, 2015, Ibrahim-Verbaas *et al.*, 2016). Second, multiple variants in this region co-localized (EUR  $r^2$  between 0.9 – 1 with rs17518584) with eQTLs of *CADM2* in numerous tissues (Lung, Adipose, Skeletal Muscle, Heart-Left Ventricle), though notably not in brain (The GTEx Consortium, 2015). That said, several SNPs with regulatory potential (RegulomeDB scores of 3a or higher) are also strongly tagged by our high-scoring haplotype (EUR  $r^2$  between 0.9 – 1.0 with rs17518584), which include regions of open chromatin in Cerebellum and other cell types (Boyle *et al.*, 2012). Several SNPs on this haplotype, particularly rs1449378 and rs1449379, fall in enhancers in several brain tissues, including the hippocampus (Ernst and Kellis, 2012, Boyle *et al.*, 2012). Taken collectively, these data suggest that our haplotype tags a region of regulatory potential that may influence the expression of *CADM2*, and potentially implicates cognitive or neuronal phenotypes in the selective pressure at this site.

## 2.4 A signature of balancing selection near the diabetes associated locus, *WFS1*

We identified a novel region of interest within the intron of *WFS1*, a trans-membrane glycoprotein localized primarily to the endoplasmic reticulum (ER). *WFS1* functions in protein assembly (Takei *et al.*, 2006) and is an important regulator of the unfolded protein and ER Stress Response pathways (Fonseca *et al.*, 2005). A haplotype in this region (approximately 3.5 kb) contains approximately 26 variants, 3 of which are in high-quality windows and are high-scoring  $\beta$  in all populations (**Fig. 5**). The haplotype was also in the top 1 percentile in our folded  $\beta$  scan in 21 populations. In the remaining 5 populations, this haplotype was at frequency 0.82 or higher, where the folded version of  $\beta$  has significantly lower power than the unfolded version.

Our identified high-scoring haplotype tags several functional and phenotypic variant associations. First, one variant that perfectly tags our signature (EUR  $r^2 = 1.0$ ), rs4458523, has been previously associated with type 2 diabetes (Voight *et al.*, 2010)(Mah, 2014). Second, multiple variants in this region are associated with expression-level changes of *WFS1* in numerous tissues (The GTEx Consortium, 2015); these variants are strongly tagged by our high-scoring haplotype (EUR  $r^2$  between 0.85 – 0.9 with rs4458523). Finally, several SNPs with regulatory potential (RegulomeDB scores of 2b or higher) are also strongly tagged by our high-scoring haplotype (EUR  $r^2$  between 0.9 – 1.0 with rs4458523). Taken collectively, these data suggest that our haplotype tags a region of strong regulatory potential that is likely to influence the expression of *WFS1*.

## 3 Discussion

Informed by previous theory on allelic-class build-up (Hey, 1991), we developed a novel summary statistic capturing to detect balancing selection. We demonstrate the efficacy and robustness of our new statistic using simulations. Moreover, while our method does not require knowledge of ancestral states for each variant from outgroup sequences, this information can improve power at extreme equilibrium frequencies.

Both introgression and population substructure are expected to cause an increase in TMRCA. Because balanced loci at very low equilibrium frequency have a very high chance of drifting out of the population, weak introgression, such as that of human with Neanderthal, is unlikely to produce high enough frequency haplotypes to be confused with balancing selection. However, in species where there has been significant introgression, top-scoring loci that

are shared across many populations can be prioritized. Regions can also be assessed for evidence of introgression if genomic sequence from both species is available. In addition, we have shown that population substructure can cause signatures of an increased TMRCA, which can be confused for signals of balancing selection. This highlights the importance of performing scans for balancing selection on individual populations when possible.

Although our method outperforms existing summary statistic methods, it is not as powerful as computationally-intensive approaches that use simulations to calculate likelihoods of observed data. This suggests the possibility that there remains additional signal that our method does not fully capture. One additional feature we did consider was an expected reduction in the number of substitutions, but the addition of this information, while significant, did not substantially improve discriminatory power (**Online Methods**). Alternative possibilities could include (i) consideration of sequences further beyond the balanced variant than the ancestral region, or (ii) deviations in the frequency spectrum beyond the closely-matched frequency to the balanced SNP we considered here.

We have focused on out-crossed species, however balancing selection can affect self-fertilizing species in similar ways. Previous research has shown that the classic signature of balancing selection can, in fact, be stronger in self-fertilizing species, due to a lower effective recombination rate (Nordborg *et al.*, 1996). However, background selection leaves a wider footprint on the genome in these species, owing to the lower effective recombination rate, which can reduce levels of polymorphism (Agrawal and Hartfield, 2016). Furthermore, the dynamics of overdominant selection may be altered in these species, due to a decrease in heterozygote variants owing to selfing. For these reasons, application of our statistic to these species requires careful consideration of optimal window size and the expected distribution of the statistic under a neutral selective model.

We have also assumed a single causal variant throughout. However, there may be more than one variant at a locus experiencing balancing selection. This situation is thought to occur throughout the HLA region (Hedrick, 1998). Assuming the maintenance of multiple variants, we would anticipate that this scenario would also increase the TMRCA regional, leading to allele class build-up, spanning perhaps a larger window than our single-variant models. The dynamics of this type of situations could be the focus of future work.

Although it is impossible to know the true selective pressure underlying our highlighted loci, our results suggest that balancing selection could be in part contribute to the genetic architecture of complex traits in human

populations. At the *CADM2* locus, functional regulatory variants seem to connect our haplotype signature to changes in gene expression and, coupled with enhancer annotation information and human phenotype associations, suggests that brain or brain-related biology may be the target of selection. Intriguingly, a recent report also noted a strong signature of selection at this locus in canine (Freedman *et al.*, 2016), suggesting a possibility of convergent evolution. That said, the phenotypes that have resulted in a historical fitness trade-off at this locus are far from obvious.

Similarly, speculation on the potential phenotypes subject to balancing selection at *WFS1* should also be interpreted cautiously. It is known that autosomal recessive, loss of function mutations in this gene cause Wolfram Syndrome, characterized by diabetes insipidus, diabetes mellitus, optic atrophy, and deafness. Studies that have investigated the role of this gene in diabetes have determined that this gene is a component of the unfolded protein response (Fonseca *et al.*, 2005) and is involved with ER maintenance in pancreatic  $\beta$ -cells. Furthermore, deficiency of *WFS1* results in increased ER stress, impairment of cell cycle, and ultimately increased apoptosis of beta-cells (Yamada *et al.*, 2006). These observations provide one mechanistic hypothesis for the common variant associated in the region: that it lowers the expression of *WFS1* in pancreas in some manner. However, the eQTLs that co-localized with the diabetes association link the risk-increasing allele with *higher* levels of expression of *WFS1*, at least in non-pancreas tissue.

Thus, the functional mechanism may be more complex. How the unfolded protein response could connect to historical balancing selection is also not immediately obvious. One possibility derives from recent work suggesting that these pathways respond not only to stimulus from nutrients or ER stress, but also to pathogens (Nakamura *et al.*, 2010). This could suggest the possibility that expression of *WFS1* is optimized in part to respond to pathogen exposure at a population level.

$\beta$  is powered to detect balancing selection when outgroup sequences are not available and can do so quickly and easily. Given the increasing ease of collecting population genetic data from non-model organisms, our approach provides an efficient way to characterize balancing selection in these populations.

An implementation of both the folded and unfolded versions of  $\beta$  is available for download at <https://github.com/ksiewert/BetaScan>.

## 4 Materials and Methods

### 4.1 Simulations

Simulations were performed using the forward genetic simulation software SLiM 2.0 (Haller and Messer, 2017). In our simulations, neutral mutations and recombination events occur at a predefined rate throughout the entire length of the simulation. A burn-in time of 100,000 generations was first simulated to achieve equilibrium levels of variation. Then, two populations representing humans and chimpanzees split from this original population, and were simulated for 250,000 additional generations. We then sampled 100 chromosomes from the human population, and 1 chromosome from the chimpanzee population. We first simulated these scenarios under parameters suitable for human populations, with mutation and recombination rates of  $\pi = r = 2.5 \times 10^{-8}$  and  $N_e = 10,000$ .

We generated two sets of simulations: one without a balanced variant (the set we refer to as our neutral simulations) and one with a balanced variant (balanced simulations). In the second set, a single balanced variant was introduced at the center of the simulated region in the human population, either at the time of speciation (250,000 generations prior to simulation ending), or 150,000 generations after speciation (100,000 generations prior to simulation ending). The simulations then continued as normal, conditional on maintenance of the balanced SNP in the population. If this balanced variant was lost, the simulation restarted at the generation in which the balanced variant was introduced. In the second (neutral) set, no balanced variant was introduced, so all variants are selectively neutral.

Each balanced SNP had an overdominance coefficient  $h$  and selection coefficient  $s$ . The fitness of the heterozygote is then  $1 + hs$ , and the fitness of the ancestral and derived homozygotes are 1 and  $1 + s$ , respectively. We simulated two different  $s$  values:  $10^{-2}$  (our default) and  $10^{-4}$ . We simulated six different equilibrium frequencies: .17, .25, .5, .75, .83, which correspond to  $h = -0.25, -0.5, 100, 1.5, 1.25$ . Negative  $h$  values were paired with negative  $s$  values.

After simulation completion, the frequency of each variant in the sampled individuals was calculated. Substitutions were defined as any variant in which the allele from the chimpanzee chromosome was not found in the sampled human individuals. For each set of balanced simulations, we define the core SNP as the variant under balancing selection. For each set of balanced simulations, we then find a corresponding set of core SNPs in our neutral simulations which are within frequency 10% of the equilibrium



frequency of the balanced variants. We then calculated the score for each statistic on these core variants. In this way, we have statistic scores for the balanced variant from each balanced simulation replicate, and a score for a neutral variant matched for similar frequency. For more details on how each statistic was calculated, see **(Supplementary Methods)**.

To increase simulation speed, we rescaled our simulation by a factor of 10 for specified power analyses in the supporting information (Hoggart *et al.*, 2007). A minimum of 1500 simulation replicates was performed for each parameter set. We simulated 10kb regions for each simulation replicate, with the exception of the analysis of optimal windows size, in which case a 100kb region was simulated.

## 4.2 Empirical Site Analysis

To apply our method to 1000 genomes data, we first downloaded data for each of the 26 populations in phase 3 of the project (obtained May 02, 2013). We then calculated allele frequencies separately for each population, and calculated  $\beta$  in 1 kb sized windows centered around each SNP for each population.

Because poorly sequenced regions can artificially inflate the number of SNPs in a region, we then filtered out regions that contained one or more base pairs that were ruled as poor quality in the 1000 Genomes phase III strict mask file. For further confirmation that the signal was not a result of poor mapping quality, we overlapped SNPs of interest with hg19 human RepeatMasker regions, downloaded from the UCSC Table Browser on February 9th, 2017. We then removed all core SNPs from consideration that were found within a Repeat, similar to what was done in Bubb *et al.* (2006). We further removed SNPs that were not of common frequency (at or above 15%) in at least one population. After filtering, there were 1,803,299 SNPs that remained. We then found the top 1% of these high-quality SNPs in each population in our  $\beta$  scan.

Unknown paralogs or other technical artifacts could inflate the number of intermediate frequency alleles. Although the 1000 Genomes dataset provides strict quality filter masks, we wanted to further verify that our haplotypes of interest in WFS1 and CADM2 were not technical artifacts. In order to do this, we used the `-hardy` flag in `vcftools` (Danecek *et al.*, 2011), and investigated both the one-tailed p-value for an excess of heterozygotes, and the two-tailed p-value, in our 4 representative populations (YRI, CEU, CDX and PJJ). All variants on these haplotypes had p-values above  $1e-3$ .

The lowest significance cut-off of any population, ASW, corresponds to

a  $\beta$  score of 49.47, which scores in the top 0.5% of neutral simulations with an equilibrium frequency of 0.5 (**Fig. S3**).

To find top-scoring sites that are also GWAS hits, we obtained LD proxies in European populations for our top-scoring SNPs, using a cut-off of  $r^2$  of 0.9, a maximum distance of 50kb and a minimum minor allele frequency of 5%. We then overlapped these LD proxies with GWAS hits obtained from the GWAS Catalog to get our final list of putatively balanced GWAS hits (Welter *et al.*, 2014). Gene names and locations were downloaded from Ensembl BioMart on November 26th, 2016.

For our trSNP comparison, we used the Human/Chimp shared haplotypes from Leffler *et al.* (2013). Using logistic regression, we then modeled the outcome of a SNP being part of a trHap as dependent on the  $\beta$  Score and distance to nearest gene.

## 5 Supplementary Material

Supplementary figures S1-S20, and Supplementary methods are available at Molecular Biology and Evolution online (<http://www.mbe.oxfordjournals.org/>).

## 6 Acknowledgments

We would like to acknowledge the members of the Voight Lab for their helpful suggestions and support and Philipp Messer for his comments on this manuscript. This work was supported through grants from the National Institutes of Health (NIDDK R01DK101478 to BFV and T32HG000046-17 to KMS) and the Alfred P. Sloan Foundation (BR2012-087 to BFV).

## References

2014. Genome-wide trans-ancestry meta-analysis provides insight into the genetic architecture of type 2 diabetes susceptibility. *Nature Genetics*, 46(3): 234–244.
- Agrawal, A. F. and Hartfield, M. 2016. Coalescence with Background and Balancing Selection in Systems with Bi- and Uniparental Reproduction: Contrasting Partial Asexuality and Selfing. *Genetics*, 202(1): 313–26.
- Aidoo, M., Terlouw, D. J., Kolczak, M. S., *et al.* 2002. Protective effects of the sickle cell gene against malaria morbidity and mortality. *The Lancet*, 359(9314): 1311–1312.

- Andrés, A. M., Hubisz, M. J., Indap, A., *et al.* 2009. Targets of balancing selection in the human genome. *Molecular Biology and Evolution*, 26: 2755–2764.
- Boyle, A. P., Hong, E. L., Hariharan, M., *et al.* 2012. Annotation of functional variation in personal genomes using RegulomeDB. *Genome Research*, 22(9): 1790–1797.
- Bubb, K. L., Bovee, D., Buckley, D., *et al.* 2006. Scan of human genome reveals no new Loci under ancient balancing selection. *Genetics*, 173(4): 2165–77.
- Charlesworth, D. 2006. Balancing selection and its effects on sequences in nearby genome regions. *PLoS Genetics*, 2(4): 379–384.
- Danecek, P., Auton, A., Abecasis, G., *et al.* 2011. The variant call format and VCFtools. *Bioinformatics*, 27(15): 2156–2158.
- Davies, G., Armstrong, N., Bis, J. C., *et al.* 2015. Genetic contributions to variation in general cognitive function: a meta-analysis of genome-wide association studies in the CHARGE consortium (N=53,949). *Molecular psychiatry*, 20(2): 183–92.
- DeGiorgio, M., Lohmueller, K. E., and Nielsen, R. 2014. A Model-Based Approach for Identifying Signatures of Ancient Balancing Selection in Genetic Data. *PLoS Genetics*, 10(8): e1004561.
- Ernst, J. and Kellis, M. 2012. ChromHMM: automating chromatin-state discovery and characterization. *Nature Methods*, 9(3): 215–216.
- Ewens, W. J. and Thomson, G. 1970. Heterozygote selective advantage. *Annals of Human Genetics*, 33(4): 365–376.
- Fay, J. C. and Wu, C. I. 2000. Hitchhiking under positive Darwinian selection. *Genetics*, 155(3): 1405–13.
- Fonseca, S. G., Fukuma, M., Lipson, K. L., *et al.* 2005. WFS1 is a novel component of the unfolded protein response and maintains homeostasis of the endoplasmic reticulum in pancreatic beta-cells. *The Journal of biological chemistry*, 280(47): 39609–15.
- Freedman, A. H., Schweizer, R. M., Ortega-Del Vecchyo, D., *et al.* 2016. Demographically-Based Evaluation of Genomic Regions under Selection in Domestic Dogs. *PLOS Genetics*, 12(3): e1005851.

- Fu, Y. 1995. Statistical Properties of Segregating Sites. *Theoretical Population Biology*, 48(2): 172–197.
- Gao, Z., Przeworski, M., and Sella, G. 2014. Footprints of ancient-balanced polymorphisms in genetic variation data from closely related species. *Evolution; international journal of organic evolution*, 69(2): 431–46.
- Gao, Z., Przeworski, M., and Sella, G. 2015. Footprints of ancient-balanced polymorphisms in genetic variation data from closely related species. *Evolution*, 69(2): 431–446.
- Gottlieb, D. J., O’Connor, G. T., and Wilk, J. B. 2007. Genome-wide association of sleep and circadian phenotypes. *BMC Medical Genetics*, 8(Suppl 1): S9.
- Haller, B. C. and Messer, P. W. 2017. SLiM 2: Flexible, Interactive Forward Genetic Simulations. *Molecular biology and evolution*, 34(1): 230–240.
- Hedrick, P. W. 1998. Balancing selection and MHC. *Genetica*, 104(3): 207–214.
- Hey, J. 1991. A multi-dimensional coalescent process applied to multi-allelic selection models and migration models. *Theoretical population biology*, 39(1): 30–48.
- Hoggart, C. J., Chadeau-Hyam, M., Clark, T. G., *et al.* 2007. Sequence-Level Population Simulations Over Large Genomic Regions. *Genetics*, 177(3).
- Hudson, R. R., Kreitman, M., and Aguadé, M. 1987. A Test of Neutral Molecular Evolution Based on Nucleotide Data. *Genetics*, 116(1): 153–159.
- Hughes, A. L. and Nei, M. 1988. Pattern of nucleotide substitution at major histocompatibility complex class I loci reveals overdominant selection. *Nature*, 335(6186): 167–170.
- Ibrahim-Verbaas, C. A., Bressler, J., Debette, S., *et al.* 2016. GWAS for executive function and processing speed suggests involvement of the CADM2 gene. *Molecular Psychiatry*, 21(2): 189–197.
- Ingvarsson, P. K. 2004. Population subdivision and the Hudson-Kreitman-Aguade test: testing for deviations from the neutral model in organelle genomes. *Genetical research*, 83(1): 31–9.

- Jiang, D.-K., Ma, X.-P., Yu, H., *et al.* 2015. Genetic variants in five novel loci including CFB and CD40 predispose to chronic hepatitis B. *Hepatology*, 62(1): 118–128.
- Leffler, E. M., Gao, Z., Pfeifer, S., *et al.* 2013. Multiple instances of ancient balancing selection shared between humans and chimpanzees. *Science (New York, N.Y.)*, 339(6127): 1578–82.
- Lopes, M. C., Hysi, P. G., Verhoeven, V. J. M., *et al.* 2013. Identification of a Candidate Gene for Astigmatism. *Investigative Ophthalmology & Visual Science*, 54(2): 1260.
- Luzzatto, L. 2012. Sickle cell anaemia and malaria. *Mediterranean journal of hematology and infectious diseases*, 4(1): e2012065.
- Nakamura, T., Furuhashi, M., Li, P., *et al.* 2010. Double-stranded RNA-dependent protein kinase links pathogen sensing with stress and metabolic homeostasis. *Cell*, 140(3): 338–48.
- Nordborg, M., Charlesworth, B., and Charlesworth, D. 1996. Increased Levels of Polymorphism Surrounding Selectively Maintained Sites in Highly Selfing Species. *Source: Proceedings: Biological Sciences*, 26312367(1373): 1033–1039.
- Rasmussen, M. D., Hubisz, M. J., Gronau, I., and Siepel, A. 2014. Genome-wide inference of ancestral recombination graphs. *PLoS genetics*, 10(5): e1004342.
- Schierup, M. H., Vekemans, X., and Charlesworth, D. 2000. The effect of subdivision on variation at multi-allelic loci under balancing selection. *Genetical research*, 76(1): 51–62.
- Singh, N. D., Jensen, J. D., Clark, A. G., and Aquadro, C. F. 2012. Inferences of Demography and Selection in an African Population of *Drosophila melanogaster*. *Genetics*, 193(1).
- Tajima, F. 1989. Statistical Method for Testing the Neutral Mutation Hypothesis by DNA Polymorphism. *Genetics*, 123(3): 585.
- Takei, D., Ishihara, H., Yamaguchi, S., *et al.* 2006. WFS1 protein modulates the free Ca<sup>2+</sup> concentration in the endoplasmic reticulum. *FEBS Letters*, 580(24): 5635–5640.

- Teixeira, J. C., de Filippo, C., Weihmann, A., *et al.* 2015. Long-Term Balancing Selection in LAD1 Maintains a Missense Trans-Species Polymorphism in Humans, Chimpanzees, and Bonobos. *Molecular biology and evolution*, pages msv007–.
- The 1000 Genomes Consortium 2015. A global reference for human genetic variation. *Nature*, 526(7571): 68–74.
- The GTEx Consortium 2015. The Genotype-Tissue Expression (GTEx) pilot analysis: Multitissue gene regulation in humans. *Science*, 348(6235): 648–660.
- Thursz, M. R., Thomas, H. C., Greenwood, B. M., and Hill, A. V. 1997. Heterozygote advantage for HLA class-II type in hepatitis B virus infection. *Nature Genetics*, 17(1): 11–12.
- Vitti, J. J., Grossman, S. R., and Sabeti, P. C. 2013. Detecting Natural Selection in Genomic Data. *Annual Review of Genetics*, 47(1): 97–120.
- Voight, B. F., Scott, L. J., Steinthorsdottir, V., *et al.* 2010. Twelve type 2 diabetes susceptibility loci identified through large-scale association analysis. *Nature Genetics*, 42(7): 579–589.
- Watterson, G. 1975. On the number of segregating sites in genetical models without recombination. *Theoretical Population Biology*, 7(2): 256–276.
- Welter, D., MacArthur, J., Morales, J., *et al.* 2014. The NHGRI GWAS Catalog, a curated resource of SNP-trait associations. *Nucleic acids research*, 42(Database issue): D1001–6.
- Xu, L., Bickhart, D. M., Cole, J. B., *et al.* 2015. Genomic signatures reveal new evidences for selection of important traits in domestic cattle. *Molecular biology and evolution*, 32(3): 711–25.
- Yamada, T., Ishihara, H., Tamura, A., *et al.* 2006. WFS1-deficiency increases endoplasmic reticulum stress, impairs cell cycle progression and triggers the apoptotic pathway specifically in pancreatic -cells. *Human Molecular Genetics*, 15(10): 1600–1609.

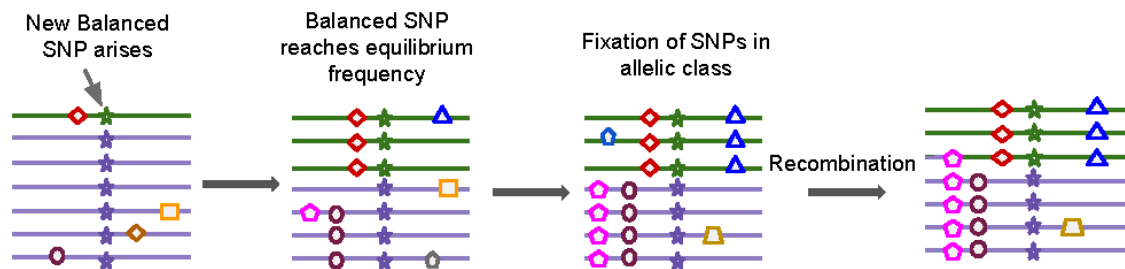

Figure 1: Model of allelic class build-up. (1) A new SNP (green star) arises in the population and is subject to balancing selection. (2) It sweeps up to its equilibrium frequency. (3) New SNPs enter the population linked to one of the two balanced alleles and some drift up in frequency. However, unlike in the neutral case, their maximum frequency is that of the balanced allele they are linked to, so variants build-up at this frequency (e.g. red diamond or brown circle). (4) Recombination decouples SNPs (e.g. pink pentagon) from the balanced site, allowing them to experience further genetic drift.



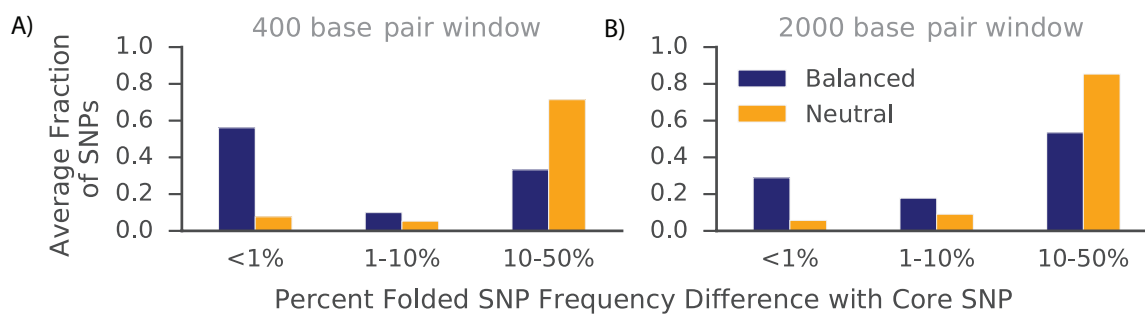

Figure 2: Simulations demonstrating build-up of alleles at frequencies similar to balanced alleles as compared to non-balanced counterparts. The blue bars indicate the fraction of SNPs in simulation replicates at specific frequency differences away from a balanced core site. In contrast, the orange bars represent simulation replicates that lack a balanced variant. Instead, the core site is chosen to be a neutral variant within frequency 10% of the equilibrium frequency of variants introduced in the balanced simulations (A) Folded frequency differences between the core SNP and each other SNP in a 400 base-pair window surrounding the core site. Recombination is not expected to have occurred in this region since the start of selection (Gao *et al.*, 2015). (B) Frequency differences in 2,000 base-pair windows, where recombination is expected to have occurred since the start of selection.

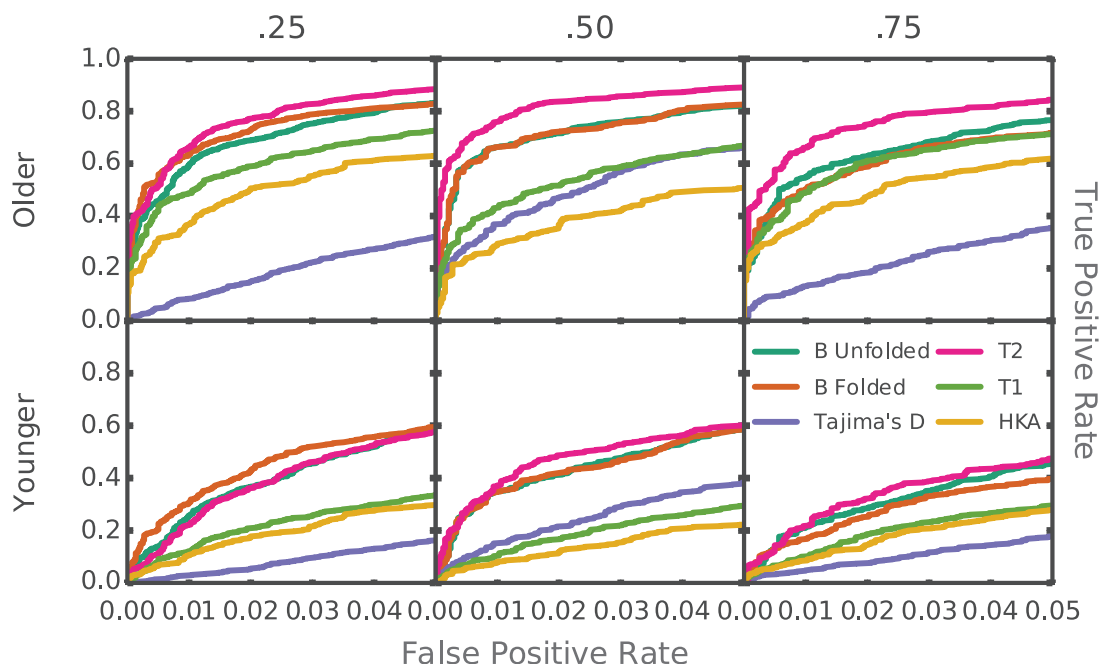

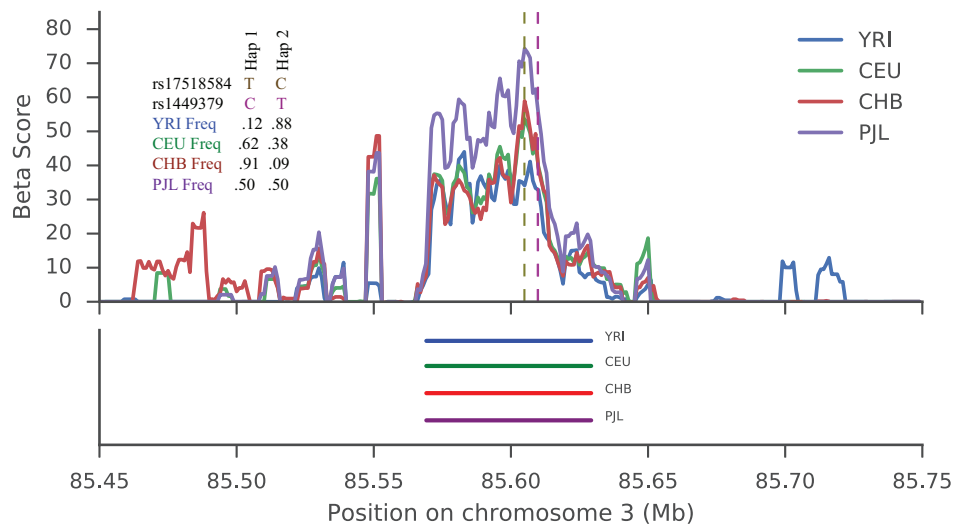

Figure 4: Signal of balancing selection at *CADM2*. The signal of selection is located in an intron of *CADM2*. (a) rs17518584 is the lead GWAS SNP for several intellectual traits and is marked by the brown vertical dashed line. The purple dashed line marks two regulatory variants found on the balanced haplotype.  $\beta$  scores were calculated using a rolling average with windows of size 5 kb, including only SNPs at the same frequency as the core SNP in the average. In addition, we show the allele frequencies of the GWAS and a top-scoring  $\beta$  SNP in each representative population. (b) Approximate haplotype lengths for each population.

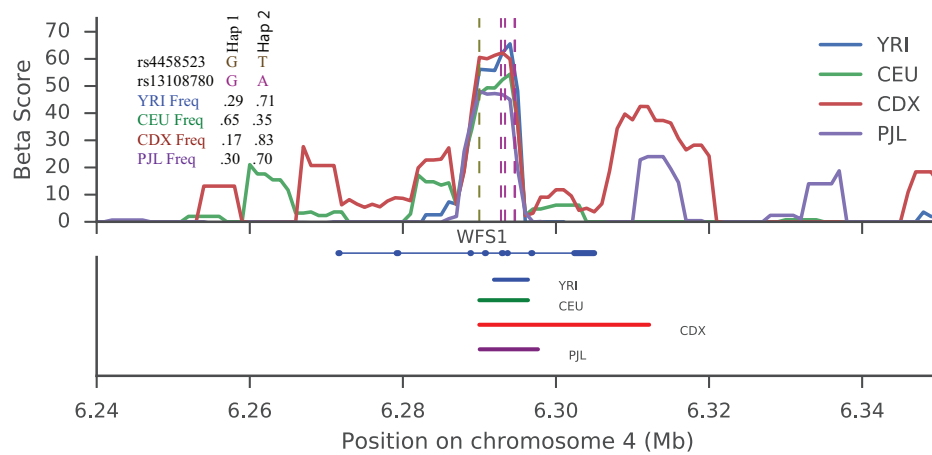

Figure 5: Signal of balancing selection at the WFS1 gene. (a) rs4458523 is the lead GWAS SNP for diabetes, and is marked by the brown vertical dashed line. The purple dashed line marks 5 regulatory variants found on the balanced haplotype. In addition, we show the allele frequencies of the GWAS and a top-scoring  $\beta$  SNP in each representative population. (b) Approximate haplotype lengths for each population.
